# Supplementary material for: Combined effects of predator cues and competition define habitat choice and food consumption of amphipod mesograzers
Source: PubMed Central journal article supplement (PMC5829112; doi:10.1007/s00442-017-4056-4), 2018-01-15
Supplement: 442_2017_4056_MOESM1_ESM.pdf [file 442_2017_4056_MOESM1_ESM.pdf]

**Combined effects of predator cues and competition define habitat choice and food consumption of amphipod mesograzers**

**- Electronic Supplementary Material -**

Jan Beermann<sup>1,2,3\*</sup>, Karin Boos<sup>4</sup>, Lars Gutow<sup>1</sup>, Maarten Boersma<sup>2,5</sup>, Ana Carolina Peralta<sup>2,6</sup>

<sup>1</sup>Alfred Wegener Institute, Helmholtz Centre for Polar and Marine Research; Functional Ecology; PO Box 120161, 27515 Bremerhaven, Germany

<sup>2</sup>Alfred Wegener Institute, Helmholtz Centre for Polar and Marine Research; Biologische Anstalt Helgoland; Postbox 180, 27483 Helgoland, Germany

<sup>3</sup>Helmholtz Institute for Functional Marine Biodiversity, Oldenburg, Germany

<sup>4</sup>MARUM - Center for Marine Environmental Sciences, University of Bremen, Leobener Straße 8, 28359 Bremen, Germany

<sup>5</sup>University of Bremen; FB2; Bremen, Germany

<sup>6</sup>Simon Bolivar University, Marine Biology Laboratory, Caracas, Venezuela

\*corresponding author, email address: Jan.Beermann@awi.de

**Table S1.** Summary of results of the multinomial regression analyses for the response variable 'habitat choice' (i.e. counts of individuals in multiple categories).

| <b>Habitat choice</b>                  |    |          |                    |                      |            |         |                                              |      |           |                 |      |
|----------------------------------------|----|----------|--------------------|----------------------|------------|---------|----------------------------------------------|------|-----------|-----------------|------|
|                                        |    |          |                    | <b>Factor levels</b> |            |         | <b>% predicted probability of appearance</b> |      |           |                 |      |
| <b>Experiment 1</b>                    | df | Chi      | p                  | predator             | competitor | shelter | algae                                        | mesh | waterline | remaining areas | dead |
| LM: LRT <sub>predator*competitor</sub> | 5  | 0,01084  | 0,999999           | absent               | absent     | 48      | 7                                            | 43   | 0         | 2               | 0    |
| LM: LRT <sub>predator</sub>            | 5  | 163,2095 | <b>&lt; 0.0001</b> | present              | absent     | 89      | 0                                            | 4    | 6         | 0               | 1    |
| LM: LRT <sub>competitor</sub>          | 5  | 4,972489 | 0,419247           | absent               | present    | 38      | 13                                           | 47   | 0         | 2               | 0    |
|                                        |    |          |                    | present              | present    | 87      | 0                                            | 5    | 8         | 0               | 0    |
|                                        |    |          |                    | <b>Factor levels</b> |            |         | <b>% predicted probability of appearance</b> |      |           |                 |      |
| <b>Experiment 2</b>                    | df | Chi      | p                  | predator             | competitor | shelter | algae                                        | mesh | waterline | remaining areas | dead |
| LM: LRT <sub>predator*competitor</sub> | 8  | 20,56998 | <b>0,008382</b>    | absent               | absent     | 51      | 6                                            | 43   | 0         | 0               | -    |
| LM: LRT <sub>predator</sub>            | 4  | 112,0918 | <b>&lt; 0.0001</b> | absent               | 5 ind.     | 40      | 0                                            | 59   | 0         | 1               | -    |
| LM: LRT <sub>competitor</sub>          | 8  | 56,16506 | <b>&lt; 0.0001</b> | absent               | 10 ind.    | 37      | 7                                            | 52   | 4         | 0               | -    |
|                                        |    |          |                    | present              | absent     | 91      | 1                                            | 4    | 4         | 0               | -    |
|                                        |    |          |                    | present              | 5 ind.     | 84      | 0                                            | 12   | 4         | 0               | -    |
|                                        |    |          |                    | present              | 10 ind.    | 56      | 13                                           | 24   | 7         | 0               | -    |
|                                        |    |          |                    | <b>Factor levels</b> |            |         | <b>% predicted probability of appearance</b> |      |           |                 |      |
| <b>Experiment 3</b>                    | df | Chi      | p                  | predator             | time       | shelter | algae                                        | mesh | waterline | remaining areas | dead |
| LM: LRT <sub>predator*competitor</sub> | 5  | 4,048881 | 0,5424             | absent               | 24 h       | 50,0    | 0,5                                          | 45,7 | 1,7       | 1,4             | 0,7  |
| LM: LRT <sub>predator</sub>            | 5  | 185,796  | <b>&lt; 0.0001</b> | absent               | 48 h       | 49,4    | 0,5                                          | 46,0 | 1,1       | 2,0             | 1,1  |
| LM: LRT <sub>competitor</sub>          | 5  | 24,87372 | <b>0,000147</b>    | absent               | 72 h       | 48,5    | 0,5                                          | 45,9 | 0,7       | 2,8             | 1,7  |
|                                        |    |          |                    | absent               | 96 h       | 47,2    | 0,5                                          | 45,4 | 0,5       | 3,8             | 2,5  |
|                                        |    |          |                    | present              | 24 h       | 78,8    | 0,0                                          | 11,4 | 9,1       | 0,0             | 0,6  |
|                                        |    |          |                    | present              | 48 h       | 84,3    | 0,0                                          | 9,0  | 5,0       | 0,0             | 1,8  |
|                                        |    |          |                    | present              | 72 h       | 86,1    | 0,0                                          | 6,8  | 2,6       | 0,0             | 4,5  |
|                                        |    |          |                    | present              | 96 h       | 82,9    | 0,0                                          | 4,8  | 1,3       | 0,0             | 11,1 |

**Table S2.** Summary of LM results for the response variable 'food consumption' (i.e. feeding rates).

| Food consumption                       |      |        |                                      |
|----------------------------------------|------|--------|--------------------------------------|
| <b>Experiment 1</b>                    | df   | F      | p                                    |
| LM: LRT <sub>predator*competitor</sub> | 16,1 | 0,0854 | 0,7738                               |
| LM: LRT <sub>predator</sub>            | 18,1 | 92,936 | < <b>0.0001</b>                      |
| LM: LRT <sub>competitor</sub>          | 17,1 | 3,4675 | 0,07997                              |
| <b>Experiment 2</b>                    | df   | F      | p                                    |
| LM: LRT <sub>predator*competitor</sub> | 24,2 | 1,3127 | 0,2877                               |
| LM: LRT <sub>predator</sub>            | 26,1 | 26,48  | < <b>0.0001</b>                      |
| LM: LRT <sub>competitor</sub>          | 26,2 | 0,5366 | 0,5911                               |
| <b>Experiment 3</b>                    | df   | Chi    | p                                    |
| LM: LRT <sub>predator*time</sub>       | 1    | 7,229  | <b>0,007173</b>                      |
| LM: LRT <sub>predator</sub>            | 1    | 13,399 | <b>0,000252</b>                      |
| LM: LRT <sub>time</sub>                | 1    | 5,1692 | <b>0,02299</b> not mentioned in text |

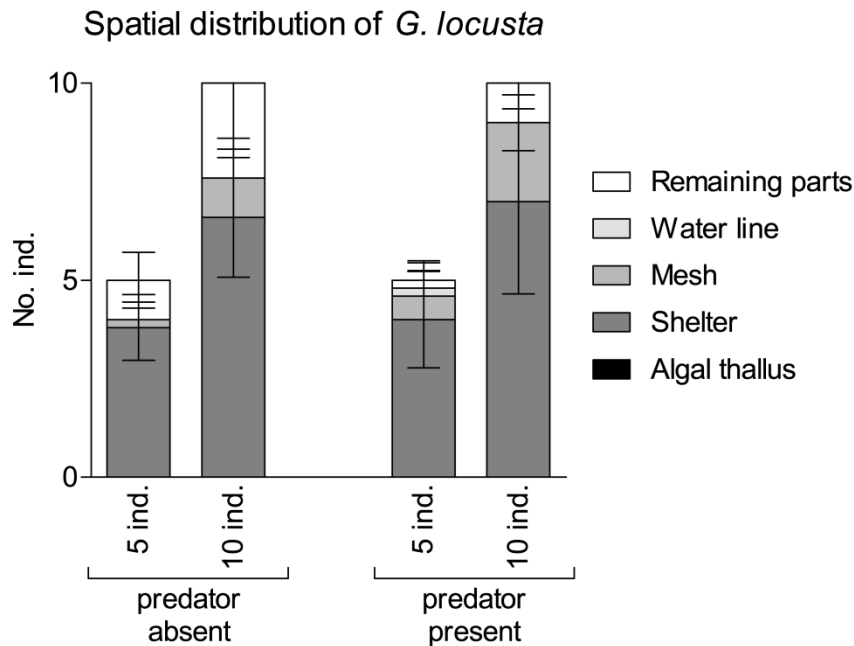

**Figure S1.** Spatial distribution of the groups (5 or 10) of *Gammarus locusta* in presence/absence of the fish predator *Taurulus bubalis* in the second experiment.
